# Supplementary material for: An atomistic insight into the corrosion of the oxide film in liquid lead–bismuth eutectic
Source: Royal Society of Chemistry journal article supplement (doi:10.1039/c3cp54377c), 2014-01-01

### Supplemental material

Based on the selected models of the (100) and (110) surface, we respectively deposited Pb atoms and Bi atoms on each surface. For each case, the adsorption energy of Pb or Bi on each surface was computed. The adsorption energies of the deposited metal atoms on the concerned surfaces are displayed in the figure below.

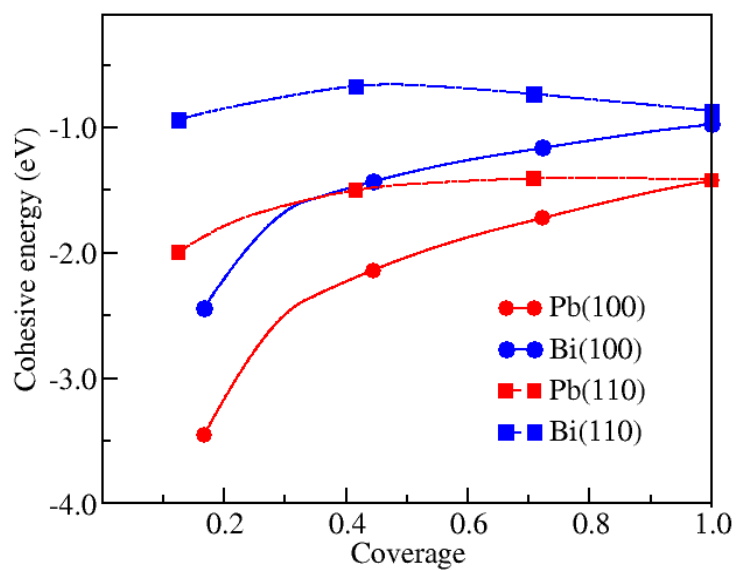

Supplement: c3cp54377c.pdf [file c3cp54377c.pdf]
